# Supplementary material for: Olmesartan Attenuates Kidney Fibrosis in a Murine Model of Alport Syndrome by Suppressing Tubular Expression of TGFβ
Source: PubMed Central journal article supplement (PMC6695622; doi:10.3390/ijms20153843), 2019-08-06
Supplement: ijms-20-03843-s001.pdf [file ijms-20-03843-s001.pdf]

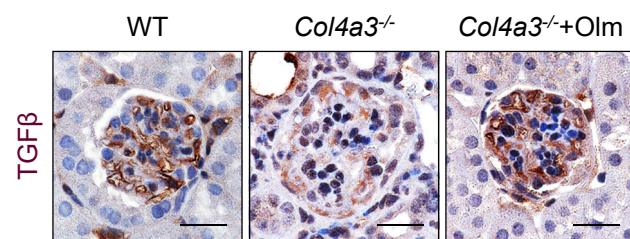

**Figure S1. Upregulation of TGFβ is not prominent in the glomerulus of *Col4a3*<sup>-/-</sup> mice.** Representative images of immunohistochemical staining for TGFβ in the glomeruli of WT, *Col4a3*<sup>-/-</sup>, and *Col4a3*<sup>-/+</sup>Olm mice. Scale bars, 50 μm.

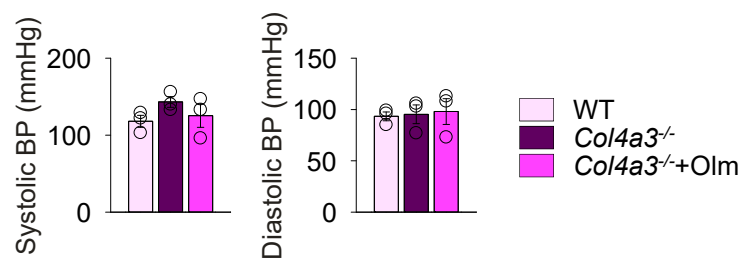

**Figure S2. Olmesartan treatment does not affect either systolic or diastolic BPs in the *Col4a3*<sup>-/-</sup> mice.** Comparison of systolic (left) and diastolic (right) BPs measured in the tail of WT, *Col4a3*<sup>-/-</sup>, and *Col4a3*<sup>-/-</sup>+Olm mice (n = 3 mice/group).

**Table S1.** List of primary and secondary antibodies for immunohistochemistry

|                                      | Host   | Reactivity   | Supplier      | Cat. No. |
|--------------------------------------|--------|--------------|---------------|----------|
| Collagen type 1                      | Rabbit | Mouse        | Abcam         | ab34710  |
| F4/80                                | Rat    | Mouse        | Bio-rad       | MCA497GA |
| Transforming growth factor $\beta$ 1 | Rabbit | Human, Mouse | Abcam         | ab92486  |
| $\alpha$ smooth muscle actin         | Mouse  | Human, Mouse | Sigma-Aldrich | A3854    |
| Rabbit IgG, HRP-linked               | Goat   | Rabbit IgG   | Vector        | PI-1000  |
| Rat IgG, HRP-linked                  | Goat   | Rat IgG      | Vector        | PI-9400  |
| Mouse IgG, HRP-linked                | Goat   | Mouse IgG    | Vector        | PI-2000  |

**Table S2.** List of primary and secondary antibodies for immunoblotting.

|                                        | Host   | Reactivity   | Supplier          | Cat. No.    |
|----------------------------------------|--------|--------------|-------------------|-------------|
| Angiotensin-converting enzyme          | Goat   | Human, Mouse | Santa Cruz        | sc12187     |
| Angiotensin-converting enzyme 2        | Goat   | Mouse        | R&D               | AF3437      |
| Angiotensin-converting enzyme 2        | Rabbit | Human        | Cell Signaling    | #4355       |
| Angiotensin II-III                     | Mouse  | Human, Mouse | Novus Biologicals | NB100-62346 |
| Ang II type 1 receptor                 | Rabbit | Human, Mouse | Santa Cruz        | sc-1173     |
| Ang II type 2 receptor                 | Rabbit | Human, Mouse | Santa Cruz        | sc-9040     |
| BAX                                    | Rabbit | Human, Mouse | Cell signaling    | #2772       |
| Bcl-2                                  | Rabbit | Human, Mouse | Cell signaling    | #3498       |
| CD68                                   | Rabbit | Mouse        | Abcam             | ab31630     |
| Caspase 3                              | Rabbit | Human, Mouse | Cell signaling    | #9662       |
| Cleaved caspase 3                      | Rabbit | Human, Mouse | Cell signaling    | #9661       |
| ERK1/2                                 | Rabbit | Human, Mouse | Cell signaling    | #9102       |
| Fibronectin                            | Rabbit | Human, Mouse | Abcam             | ab2413      |
| Heme oxygenase 1                       | Mouse  | Mouse        | Abcam             | ab13248     |
| JNK                                    | Rabbit | Human, Mouse | Cell signaling    | #9252       |
| P38                                    | Rabbit | Human, Mouse | Cell signaling    | #9212       |
| Phospho-ERK1/2                         | Rabbit | Human, Mouse | Cell signaling    | #9101       |
| Phospho JNK                            | Rabbit | Human, Mouse | Cell signaling    | #9251       |
| Phospho P38                            | Rabbit | Human, Mouse | Cell signaling    | #9215       |
| Phospho SMAD2/3                        | Rabbit | Human, Mouse | Cell Signaling    | #8828       |
| SMAD4                                  | Rabbit | Human, Mouse | Cell Signaling    | #38454      |
| SMAD2/3                                | Rabbit | Human, Mouse | Cell Signaling    | #3012       |
| TNF $\alpha$ -converting enzyme (TACE) | Rabbit | Human, Mouse | Millipore         | AB19027     |
| Transforming growth factor $\beta$     | Rabbit | Human, Mouse | Cell Signaling    | #3711       |
| $\alpha$ smooth muscle actin           | Mouse  | Human, Mouse | Sigma-Aldrich     | A3854       |
| $\beta$ -actin                         | Rabbit | Human, Mouse | Cell Signaling    | #3711       |
| Goat IgG, HRP-linked                   | Rabbit | Goat IgG     | Sigma-Aldrich     | AP106P      |
| Rabbit IgG, HRP-linked                 | Goat   | Rabbit IgG   | Cell Signaling    | #7074       |
| Mouse IgG, HRP-linked                  | Horse  | Mouse IgG    | Cell Signaling    | #7076       |

**Table S3.** List of primer sequences for real-time qPCR

|                                   | Forward                  | Reverse                  |
|-----------------------------------|--------------------------|--------------------------|
| <i>mActa2</i> ( $\alpha$ SMA)     | ACTGGGACGACATGGAAAAG     | CATCTCCAGAGTCCAGCACA     |
| <i>mCol1a1</i> (collagen, type I) | GAGCGGAGAGTACTGGATCG     | TACTCGAACGGGAATCCATC     |
| <i>mGapdh</i>                     | TGTGTCCGTCGTGGATCTGA     | GATGCCTGCTTCACCACCTT     |
| <i>mIcam1</i>                     | AAC TTTTCAGCTCCGGTCCTG   | TCAGTGTGAATTGGACCTGCG    |
| <i>mIl-6</i>                      | ACAACCACGGCCTTCCCTACTT   | CACGATTTCCCAGAGAACATGTG  |
| <i>mFn1</i> (fibronectin)         | ACACGGTTTCCCATTACGCCAT   | AATGACCACTGCCAAAGCCCAA   |
| <i>mTgfb1</i> (TGF $\beta$ )      | CAACAATTCCTGGCGTTACCTTGG | GAAAGCCCTGTATTCCGTCTCCTT |
| <i>mTnf</i> (TNF $\alpha$ )       | GCATGATCCGCGACGTGGAA     | AGATCCATGCCGTTGGCCAG     |
| <i>Vcam1</i>                      | TCTCTCAGGAAATGCCACCC     | CACAGCCAATAGCAGCACAC     |
